# Supplementary material for: Mr-AbaA Regulates Conidiation by Interacting with the Promoter Regions of Both Mr-veA and Mr-wetA in Metarhizium robertsii
Source: PubMed Central journal article supplement (PMC8557821; doi:10.1128/spectrum.00823-21), 2021-09-08
Supplement: spectrum00823-21_supp_1_seq12.pdf [file spectrum00823-21_supp_1_seq12.pdf]

SUPPLEMENTAL MATERIAL

**Mr-AbaA regulates conidiation by interacting with the promoter region of *Mr-veA* and *Mr-wetA* in *Metarhizium robertsii***

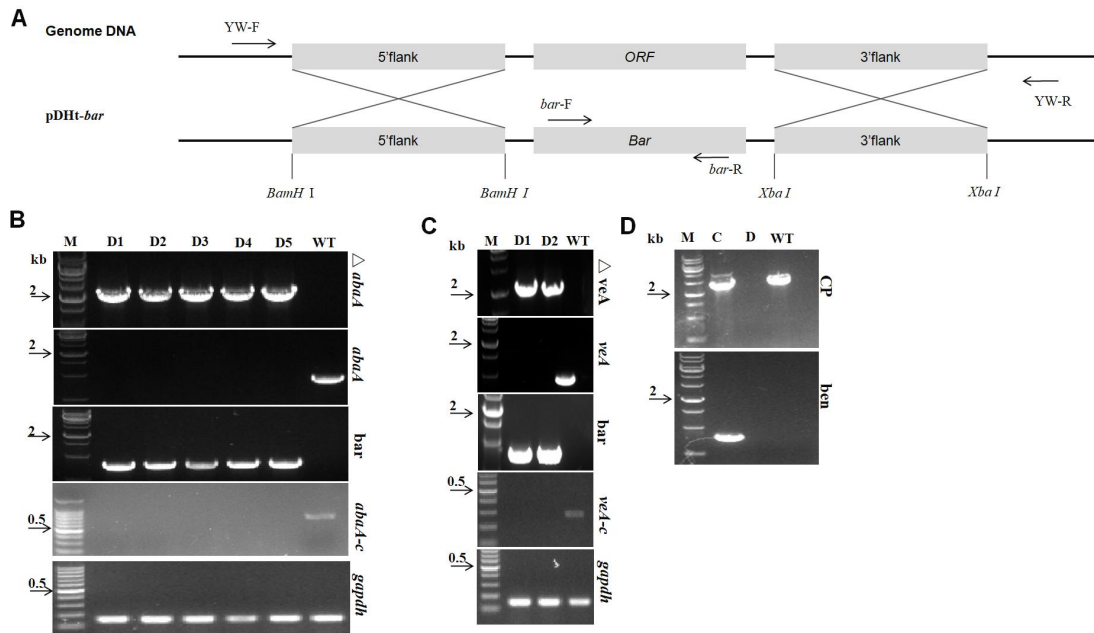

**Figure S1.** Gene deletions of *Mr-abaA*, and *Mr-veA* in *M. robertsii* ARSEF 23. (A) Schematic diagram of gene deletions by the homologous recombination approach. (B, C, D) Confirmation of the *Mr-abaA*, *Mr-veA* and the complemented strain of *Mr-veA* via PCR and RT-PCR. The targeted genes and *gapdh* were amplified using DNA from a different strain or cDNA as templates, respectively. M: marker. D: gene deletion mutant; WT: the wild-type strain. C: complemented strains

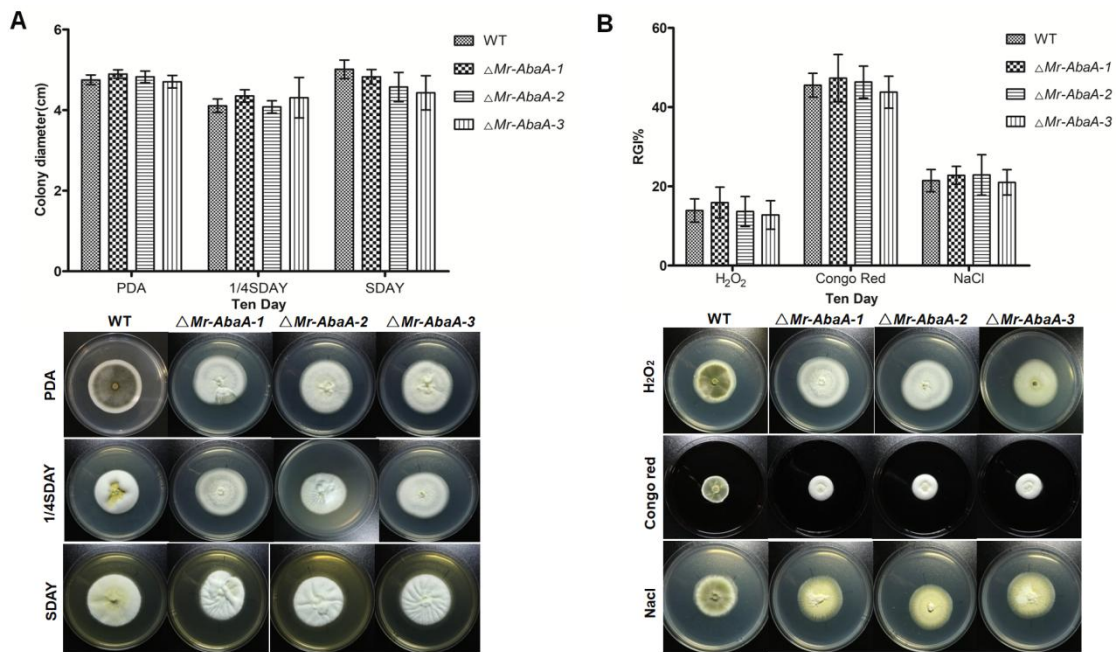

**Figure S2. Effects of *Mr-abaA* deletion on hyphal growth of *M. robertsii* on different media. (A)** The colony diameters of each strain were measured after 10 dpi on PDA, SDAY, and 1/4 SDAY plates. The colony phenotype of each strain cultured for 10 days on the above medium was evaluated. **(B)** Relative growth inhibition (RGI) of each strain fungal colony after 10 days of culture under H<sub>2</sub>O<sub>2</sub>, Congo red, and NaCl stress on PDA. The colony phenotype of each strain cultured under the above stress conditions for 10 days was evaluated.

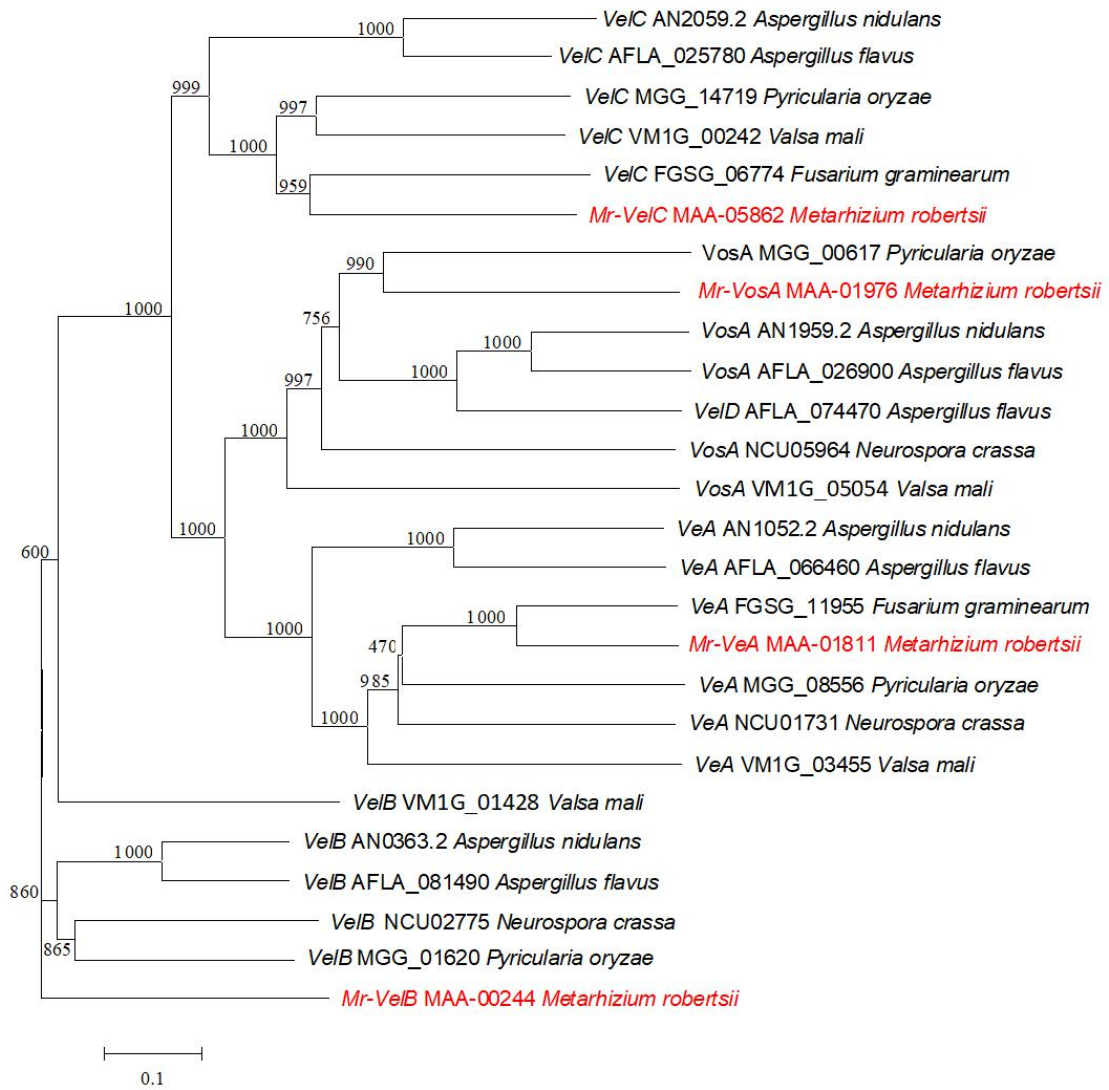

**Figure S3. Phylogenetic tree analysis of the *M. robertsii* velvet family genes.**

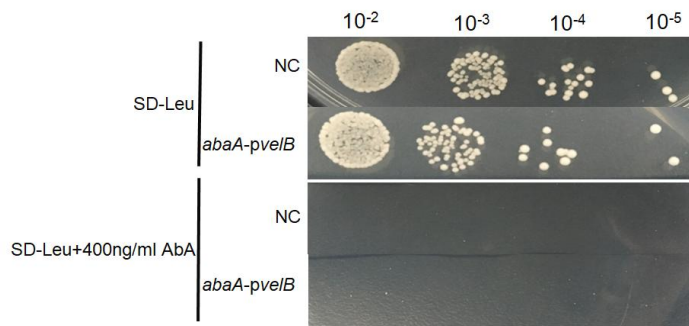

**Figure S4. Analysis of the protein-DNA interaction.** Yeast one-hybrid assay to test the interactions of Mr-AbaA with the *Mr-velB* promoter regions NC: Negative control. *abaA-pvelB*: interaction between the Mr-AbaA protein and the *Mr-velB* promoter region. AbA, aureobasidin A.

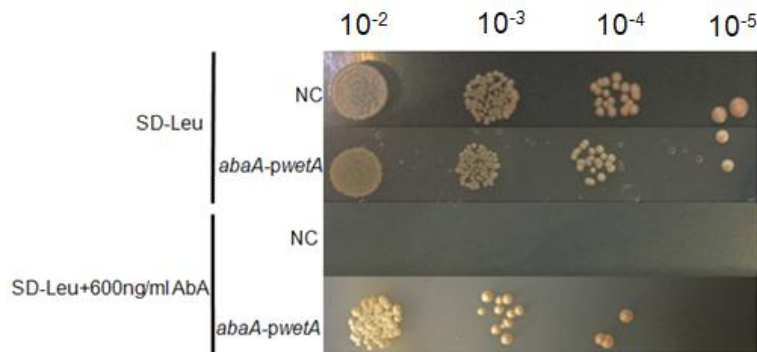

**Figure S5. Analysis of the protein-DNA interaction.** Yeast one-hybrid assay to test the interactions of Mr-AbaA with the *Mr-wetA* promoter regions NC: Negative control. *abaA-pwetA*: interaction between the Mr-AbaA protein and the *Mr-wetA* promoter region. AbA, aureobasidin A.

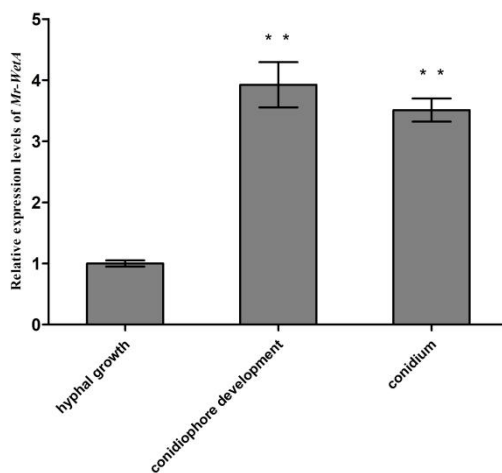

**Figure S6. Transcriptional profiles of *Mr-wetA*.**

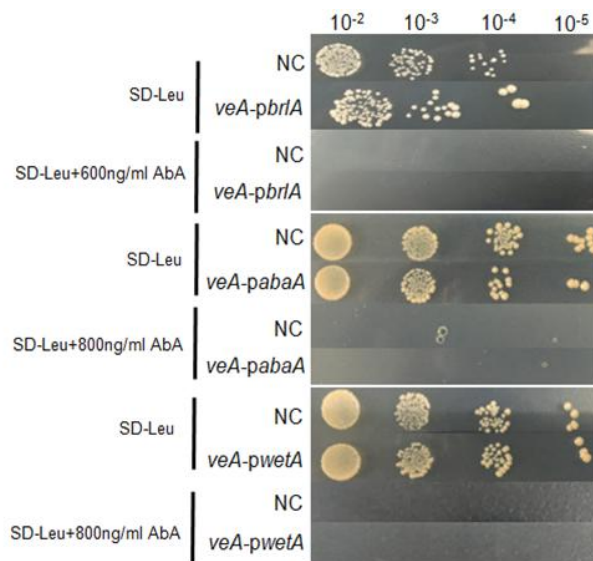

**Figure S7. Analysis of the protein-DNA interaction.** Yeast one-hybrid assay to test the interactions of Mr-VeA with the *Mr-brlA*, *Mr-abaA*, and *Mr-wetA* promoter regions. NC: Negative control. *veA-pbr1A*: interaction between the Mr-VeA protein and the *Mr-brlA* promoter region. *veA-pabaA*: interaction between the Mr-VeA protein and the *Mr-abaA* promoter region. *veA-pwetA*: interaction between the Mr-VeA protein and the *Mr-wetA* promoter region. AbA, aureobasidin A. The results showed that the Mr-VeA could not directly bind to the promoter regions of *Mr-brlA*, *Mr-abaA*, and *Mr-wetA*.

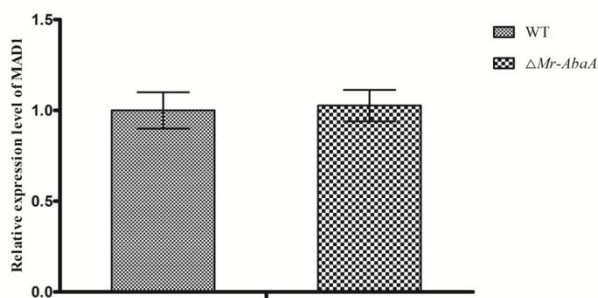

**Figure S8. qRT-PCR analysis of the expression level of MAD1 between the WT and  $\Delta Mr-abaA$ .**

**Table S1 Primers used for functional analyses of two genes in *M. robertsii*.**

| Primer name                        | Primer sequence(5' - 3') <sup>a</sup>         | Purpose of use                                       |
|------------------------------------|-----------------------------------------------|------------------------------------------------------|
| <b>Component of <i>Mr-abaA</i></b> |                                               |                                                      |
| <i>abaA</i> -SF                    | CGGGATCCTCTCAAGGCAATGGATGGGC                  |                                                      |
| <i>abaA</i> -SR                    | CGGGATCCGACGCAACGAACGAGAACCA                  | Amplifying upstream flanking sequence                |
| <i>abaA</i> -XF                    | GCTCTAGATTATCTCCACGCCCTCCT                    |                                                      |
| <i>abaA</i> -XR                    | GCTCTAGATTTGAAATATCCGGTCCTTT                  | Amplifying downstream flanking sequence              |
| <i>abaA</i> -MF                    | AGCACCATCTATGCAAACCA                          |                                                      |
| <i>abaA</i> -MR                    | GTAGGCAACATCATCCCGAA                          | PCR for <i>abaA</i> to screen the transformants      |
| <i>abaA</i> -YWR                   | TCTTGTGCGGTGCGGATAG                           | PCR for $\Delta$ <i>abaA</i> to confirm the mutant   |
| <i>abaA</i> -GFP-b1F               | ttctcagcccggggatccAAGAAATCGAGAAGATGCAGCG      | Amplifying the promoter region and                   |
| <i>abaA</i> -GFP-b1R               | tgctaccatCCATCCAGCAGTGACGGGC                  | <i>Mr-abaA</i> sequence to construct the EGFP        |
| <i>abaA</i> -GFP-b2F               | tgctgatggATGGTGAGCAAGGGCGAGG                  | fusion protein                                       |
| <i>abaA</i> -GFP-b2R               | tcattctctcagcgatccTTACTTGTACAGCTCGTCCATGCC    | Amplifying EGFP sequence                             |
| <i>abaA</i> -cdfsF                 | gccatggagccagtgaaattcATGTCTTCACTCTTTCAGCCAAGA | Amplifying the <i>Mr-abaA</i> ORF for yeast          |
| <i>abaA</i> -cdfsR                 | atgccaccggggtgaaattcTCACCATCCAGCAGTGACGG      | one-hybrid test                                      |
| <i>p-wetA</i> -F                   | aattcagagctcggtaccgggATGTTTGAGCGGTAATGGC      |                                                      |
| <i>p-wetA</i> -R                   | cgaggtcgacagatccccgggGGCGTGTGATGTTGTGTGT      | Amplifying <i>Mr-wetA</i> promoter region            |
| <i>p-veA</i> -F                    | aattcagagctcggtaccgggTGAGTTGATCGCCACCCTGC     |                                                      |
| <i>p-veA</i> -R                    | cgaggtcgacagatccccgggTTTGTCTAGCAGTCTCAAGGTTG  | Amplifying <i>Mr-veA</i> promoter region             |
| <i>p-velB</i> -F                   | aattcagagctcggtaccgggTTGTGATTGACTCTTTGCGA     |                                                      |
| <i>p-velB</i> -R                   | cgaggtcgacagatccccgggGTTCAAATGGTGGTTTCTGG     | Amplifying <i>Mr-velB</i> promoter region            |
| <i>abaA</i> -F                     | AGCACCATCTATGCAAACCA                          |                                                      |
| <i>abaA</i> -R                     | GTAGGCAACATCATCCCGAA                          | RT-PCR for <i>abaA-c</i> to confirm the mutant       |
| <b>Component of <i>Mr-VeA</i></b>  |                                               |                                                      |
| <i>veA</i> -SF                     | CGGAATCCCCCTACTTGCATACGA                      |                                                      |
| <i>veA</i> -SR                     | CGGGATCCGCGAATGAACGGGATGGTG                   | Amplifying upstream flanking sequence                |
| <i>veA</i> -XF                     | GGACTAGTTCGCTCTGCTACTTTGCCTA                  |                                                      |
| <i>veA</i> -XR                     | GGACTAGTCGCTCCACTTTTCTCTCTC                   | Amplifying downstream flanking sequence              |
| <i>veA</i> -MF                     | GACTACCAAGGAGGAAAAAGAC                        |                                                      |
| <i>veA</i> -MR                     | ATAATAGGAGACACAGGCACAG                        | PCR for <i>Mr-veA</i> to screen the transformants    |
| <i>veA</i> -YWR                    | GCGGGAAAGGAGAAAAATAGTT                        | PCR for $\Delta$ <i>Mr-veA</i> to confirm the mutant |
| <i>veA</i> -F                      | TGAAAGCCAATAGCGACAGAC                         |                                                      |
| <i>veA</i> -R                      | CGGGAAAGATGAAGTAACCAG                         | RT-PCR for <i>Mr-veA-c</i> to confirm the mutant     |
| <i>veA</i> -cdfsF                  | gccatggagccagtgaaattcATGCCGCCCTCATCTGTACA     | Amplifying the <i>Mr-veA</i> ORF for yeast           |
| <i>veA</i> -cdfsR                  | atgccaccggggtgaaattcCTATTGGTACCGTTGAAGTGAATC  | one-hybrid test                                      |
| <i>p-brlA</i> -F                   | aattcagagctcggtaccgggGCCTCAACTTCACCATACATGGG  |                                                      |
| <i>p-brlA</i> -R                   | cgaggtcgacagatccccgggGTGTTGTTATTGTTGCTGTTGCTG | Amplifying <i>Mr-brlA</i> promoter region            |
| <i>p-abaA</i> -F                   | aattcagagctcggtaccgggCTGGGCGCTGTGTAGATAGATCT  |                                                      |
| <i>p-abaA</i> -R                   | cgaggtcgacagatccccgggAACTGCAAAGCAAAAAAAGA     | Amplifying <i>Mr-abaA</i> promoter region            |
| <i>veA</i> -CPF                    | aagcttcgcaactgttctagaTTGATCGCCACCCTGCAT       |                                                      |
| <i>veA</i> -CPR                    | cgcggtggcgccgctctagaGACGCCGACTCCTTCCATG       | PCR for CP to screen the transformants               |
| <i>ben</i> -F                      | CCTCCACATAGACCCGTGTTCTGT                      |                                                      |

---

|               |                         |                                             |
|---------------|-------------------------|---------------------------------------------|
| <i>ben</i> -R | CAGAGGAGCCTGAATGTTGAGTG | PCR for CP to screen the transformants      |
| <i>bar</i> -F | ATTTTGGTTTAGTCGTCCAGGCG |                                             |
| <i>bar</i> -R | AGCTGCCAGAAACCCACGTCATG | PCR for mutants to screen the transformants |

---

**a:** The lowercase letter in primers are required for cloning the PCR products into plasmids by homologous recombination and the red font showed the restriction enzyme.

**Table S2 Primers used for qRT-PCR analysis**

| Gene           | Tag locus | Annotation                                          | primer (5'-3')                              |
|----------------|-----------|-----------------------------------------------------|---------------------------------------------|
| <i>gapdh</i>   | MAA_07675 | glyceraldehyde 3-phosphate dehydrogenase            | GACTGCCCGCATTGAGAAG/AGATGGAGGAGTTGGTGTG     |
| <i>fluG</i>    | MAA_00122 | protein fluG                                        | TGCGGGTTGAATACGG/CTCCACCTCTTCTCTCTGA        |
| <i>flbA</i>    | MAA_06313 | developmental regulator flbA                        | ACTCAAAGGGCATCACG/CAACAAAGCGGCGGAATA        |
| <i>flbC</i>    | MAA_04342 | developmental regulator flbC                        | TTTCCAATCTACGACGACA/AGTCCGATTGATGGTCTTC     |
| <i>flbD</i>    | MAA_03655 | developmental regulator flbD                        | AACGATGGGCTGAGATTG/GGTGATTGAGTTTCGGATG      |
| <i>brlA</i>    | MAA_10599 | central regulator BrlA                              | ATCCTTTTGCTACTCACCA/ACCATTCCATCCAACCTCT     |
| <i>abaA</i>    | MAA_00694 | central regulator AbaA                              | AAACCACTATTCTGTCTCC/AGCCTGCCTGTTACGATA      |
| <i>wetA</i>    | MAA_02845 | central regulator WetA                              | CGACGAAATAGGAAAGCA/TGAAGTGGAGGAGATACGG      |
| <i>stuA</i>    | MAA_02988 | APSES transcription factor StuA                     | GCAAGGCACCAACCCACT/TGCTGCTCCGTAGGCTGA       |
| <i>veA</i>     | MAA_01811 | velvet family gene VeA                              | TGAAAGCCAATAGCGACAGAC/CGGAAAAGATGAAGTAACCAG |
| <i>velB</i>    | MAA_00244 | velvet family gene velB                             | CAGGAAAACCTCTTGGGA/TCGCCGAAACCGCACATT       |
| <i>vosA</i>    | MAA_01976 | velvet family gene vosA                             | TTCACCATCACTCGGCACC/CTTTTCTTTCCAACGGC       |
| <i>velC</i>    | MAA_05862 | velvet family gene velC                             | AGACGGGTTCAAATAGCC/TGTTTACTGAGGACGGAT       |
| <i>hk1</i>     | MAA_04209 | Hexokinase                                          | ATTCAAAGAACGTGGTGCC/ATTGCCAGCCTTGACTCTCT    |
| <i>hk2</i>     | MAA_05057 | Hexokinase                                          | GTCACCTCAAGCCGTACAG/CAACTCGGAATCTGTACG      |
| <i>pfk</i>     | MAA_09075 | Phosphofructokinase                                 | TGCGCAACATTATCCGCGAG/CTTCTGTACGCGGTTATGGG   |
| <i>pk</i>      | MAA_06851 | Pyruvate kinase                                     | TGTCTGGTGAACGGCAAAG/CAATGATACCACCAGCAGCC    |
| <i>pc</i>      | MAA_04366 | Pyruvate carboxylase                                | TCGGGAGATATGCTGAACCC/ACACCAGTACCAGCAGAGTC   |
| <i>icd</i>     | MAA_03118 | Isocitrate dehydrogenase                            | TAAGAATCCGGTCGTGGAAC/GTGACCTGGTCGTTGGTCTT   |
| <i>pp</i>      | MAA_02781 | Pyruvate permease                                   | TCATCCCCATCCACCTCATG/TAGACGCAGCCCATGAAGAT   |
| <i>pdE1</i>    | MAA_08787 | Pyruvate dehydrogenase E1 component<br>beta subunit | GTCAACTCTGCCGAAAGAC/CAGCCTTGAGAAGACCCTTG    |
| <i>D-lcd</i>   | MAA_07000 | D-lactate dehydrogenase                             | TGCCTACGACCCATTTCCAT/TATTCACCAGCATCACCCCA   |
| <i>icl</i>     | MAA_04402 | Isocitrate lyase                                    | CCGTATGAAGCTACCAAG/AGGTCGTCGCCATAATGTC      |
| <i>hsp70-L</i> | MAA_03832 | Hsp70-like protein                                  | AGGTCCTGCAGCTCAITTTCT/CCGCAAACCTCGTAGTCATG  |
| <i>hsp20a</i>  | MAA_10381 | Heat shock protein Hsp20                            | CGCCCAAATAAAGGAGCCAG/CGCCCAAATAAAGGAGCCAG   |
| <i>hsp20b</i>  | MAA_07190 | Heat shock protein Hsp20                            | ACATTGAATTCACCGAGCCG/CAGTACTGTACTTGGGCGC    |
| <i>hsp30</i>   | MAA_04014 | Heat shock protein 30                               | CTGAGCCCGAGGAGAAG/GACACGGTTGGGAAAGT         |
| <i>hsp40a</i>  | MAA_02497 | Heat shock protein 40                               | AGCGAGGCGAGGTGAA/GGTGGTGGCAGCATTT           |
| <i>hsp40b</i>  | MAA_03231 | Heat shock protein 40                               | AGAGGAAGCCAACGACG/TCCGCAAGAGTAACAACGAG      |
| <i>hsp40c</i>  | MAA_06393 | Heat shock protein 40                               | CGCCAACAGGAAAGACT/GCCGTGGTAAGAGGAAT         |
| <i>hsp60</i>   | MAA_07685 | Heat shock protein 60                               | CGGCCAACTTTGACCAG/CAATGACAACGGAACCTT        |
| <i>hsp70</i>   | MAA_00810 | Heat shock protein 70                               | TTCAAAGAGGGATACCACC/TTCAAAGAGGGATACCACC     |
| <i>hsp90</i>   | MAA_04726 | Heat shock protein 90                               | TATGTCCCGCTGTCTT/TGTTCTGCTGGAGGGTC          |
| <i>hsp104</i>  | MAA_03534 | Heat shock protein 104                              | TCTGCGGTCCCTCTGGT/CGGCTAAGTGCCTGTCTG        |
| <i>catA</i>    | MAA_05879 | Catalase                                            | ATCAACAGACCCGTTGTTC/GTGAAGAAGCCTTTGCTTGG    |
| <i>catB</i>    | MAA_06740 | chanoclavine synthase catalase protein              | TCCACTGGTTCCTGTATCC/GCATCTTCGGGGTCAATGAC    |
| <i>p-cat</i>   | MAA_10327 | Peroxisomal catalase                                | CGATATTGGGGCACTGAAGC/ACGGGTTCCAGATCTCCTTG   |
| <i>catC</i>    | MAA_01261 | Catalase                                            | ATTGCCCATCTTCAACGG/CTGCCTGTCAAATCCGCT       |
| <i>catD</i>    | MAA_05785 | Catalase                                            | GAGATGGTGGCATGGTTGTC/CGTCACATCGCCAAAGAGAG   |
